# Supplementary material
Source: PubMed Central journal article supplement (PMC4222631)
Supplement: ac502727s_si_001.pdf [file ac502727s_si_001.pdf]

## SUPPORTING INFORMATION

# **Quantification of fucosylated hemopexin and complement factor H in plasma of patients with liver disease.**

Julius Benicky<sup>#a</sup>, Miloslav Sanda<sup>#a</sup>, Petr Pompach<sup>b,c</sup>, Jing Wu<sup>a</sup>, Radoslav Goldman<sup>a,d,\*</sup>

<sup>a</sup> *Department of Oncology, Lombardi Comprehensive Cancer Center, Georgetown University. Washington, D.C. 20057;*

<sup>b</sup> *Institute of Microbiology v.v.i., Czech Academy of Sciences, Prague, Czech Republic;*

<sup>c</sup> *Department of Biochemistry, Faculty of Sciences, Charles University, Prague, Czech Republic*

# Authors contributed equally

\* Corresponding author. Tel: 202-687-9868, Fax: 202-687-1988, E-mail: rg26@georgetown.edu

## TABLE OF CONTENTS

|                                                                                                                                                                                                                               |             |
|-------------------------------------------------------------------------------------------------------------------------------------------------------------------------------------------------------------------------------|-------------|
| <b>Table S-1</b> .....                                                                                                                                                                                                        | <b>S-3</b>  |
| List of glycopeptides obtained by tryptic digestion of hemopexin and CFH.                                                                                                                                                     |             |
| <b>Table S-2</b> .....                                                                                                                                                                                                        | <b>S-4</b>  |
| Glycosite occupancy at singly glycosylated peptides of hemopexin and CFH in healthy controls and liver disease patients.                                                                                                      |             |
| <b>Table S-3</b> .....                                                                                                                                                                                                        | <b>S-5</b>  |
| Normalized signal intensities of individual glycoforms of hemopexin and CFH used for relative quantification of fucosylation presented in Figure 1. Table shows values for tryptic glycopeptides prior glycosidase treatment. |             |
| <b>Table S-4</b> .....                                                                                                                                                                                                        | <b>S-7</b>  |
| Normalized signal intensities of individual glycoforms of hemopexin and CFH used for the relative quantification of fucosylation presented in Figure 2. Table shows values for desialylated tryptic glycopeptides.            |             |
| <b>Table S-5</b> .....                                                                                                                                                                                                        | <b>S-8</b>  |
| Mass-to-charge ratios of precursor ions selected for LC-MS-MRM quantification presented in Figure 4.                                                                                                                          |             |
| <b>Table S-6</b> .....                                                                                                                                                                                                        | <b>S-9</b>  |
| MRM-based quantification of fucosylation in individual patient samples presented in Figure 4.                                                                                                                                 |             |
| <b>Figure S-1</b> .....                                                                                                                                                                                                       | <b>S-11</b> |
| Chromatogram of RP-HPLC C18 separation of hemin-bound fraction and SDS-PAGE visualization of purified hemopexin and CFH.                                                                                                      |             |
| <b>Figure S-2</b> .....                                                                                                                                                                                                       | <b>S-12</b> |
| Similar chromatographic behavior of fucosylated and non-fucosylated glycopeptides.                                                                                                                                            |             |
| <b>Figure S-3</b> .....                                                                                                                                                                                                       | <b>S-13</b> |
| MRM-based quantification in individual patient samples. Dot plot version of Figure 4 showing the distribution of values.                                                                                                      |             |
| <b>Figure S-4</b> .....                                                                                                                                                                                                       | <b>S-15</b> |
| Correlation of fucosylation with liver damage parameters.                                                                                                                                                                     |             |

**Table S-1**

| <b>Protein<br/>UNIPROT #</b> | <b>Glycosite<br/>position</b> | <b>Glycopeptide</b>                                                        |
|------------------------------|-------------------------------|----------------------------------------------------------------------------|
| Hemopexin<br><i>P02790</i>   | N64                           | CSDGWSFDATTLDDN <sup>64</sup> GTMLFFK                                      |
|                              | N187                          | SWPAVGN <sup>187</sup> CSSALR                                              |
|                              | N240/N246                     | N <sup>240</sup> GTGHGN <sup>246</sup> STHHGPEYMR                          |
|                              | N453                          | ALPQPQN <sup>453</sup> VTSLLGCTH                                           |
| CFH<br><i>P08603</i>         | N217                          | SPDVIN <sup>217</sup> GSPISQK                                              |
|                              | N529                          | LN <sup>529</sup> DTLDYEC HDGYESNTGSTTGSIVCGYNGWSDLPICYER                  |
|                              | N718                          | IQVDGEWTTLPVCIVEESTCGDIPELEHGWAQLSSPPYYYGDSVEFN <sup>718</sup> CSESFTMIGHR |
|                              | N802 /N822                    | WDPEVN <sup>802</sup> CSMAQIQLCPPPQIPNSHN <sup>822</sup> MTTTLNYR          |
|                              | N882                          | IPCSQPPQIEHGTIN <sup>882</sup> SSR                                         |
|                              | N911                          | ISEEN <sup>911</sup> ETTCYMGK                                              |
|                              | N1029                         | MDGASN <sup>1029</sup> VTCINSR                                             |
|                              | N1095                         | SPYEMFGDEEVMCLNGN <sup>1095</sup> WTEPPQCK                                 |

**Table S-1. Glycopeptides obtained by tryptic digest of hemopexin and CFH**

**Table S-2**

| Protein                    |                        | UNIPROT<br>position | Site occupancy (%) |     |     |
|----------------------------|------------------------|---------------------|--------------------|-----|-----|
| <i>UNIPROT ID</i>          | Peptide                |                     | H                  | CIR | HCC |
| Hemopexin<br><i>P02790</i> | CSDGWSFDATTLDDNGTMLFFK | N64                 | 96                 | 96  | 97  |
|                            | SWPAVGNCSSALR          | N187                | 100                | 100 | 100 |
|                            | ALPQPQNVTSLLGCTH       | N453                | 99                 | 99  | 98  |
| CFH<br><i>P08603</i>       | SPDVINGSPISQK          | N217                | 87                 | 92  | 91  |
|                            | IPCSQPPQIEHGTINSSR     | N882                | 76                 | 78  | 80  |
|                            | ISEENETTCYMGK          | N911                | 93                 | 96  | 93  |
|                            | MDGASNVTCINSR          | N1029               | 99                 | 99  | 99  |

**Table S-2. Site occupancy.** Site occupancy, shown as percent of glycosylated peptide, was determined in pooled samples (n=2 per group, 5 patient per pool) of healthy controls (H), cirrhosis (CIR) and HCC patients for all detected singly glycosylated sites as described in Material and Methods. The site occupancy of 100% means that non-glycosylated form of peptide was not detected. The results represent average of the two pooled samples. None of the sites changes significantly ( $p < 0.05$ ) in occupancy with disease state.

**Table S-3**

| Protein<br><i>UNIPROT #</i> | Glycosite<br>position | Glycan<br>structure | m/z(charge)    | H (SI)      | H<br>[%]      | CIR (SI)   | CIR<br>[%]   | HCC (SI)     | HCC<br>[%] |
|-----------------------------|-----------------------|---------------------|----------------|-------------|---------------|------------|--------------|--------------|------------|
| Hemopexin<br><i>P02790</i>  | N64                   | A2G2S1              | 1111.1937 (4+) | 10090±1337  | 8.3           | 7523±870   | 6.6          | 9351±432     | 6.6        |
|                             |                       | A2G2S2              | 1183.9676 (4+) | 101335±9745 | 83.4          | 90072±9254 | 79.1         | 112117±11511 | 79.1       |
|                             |                       | A2G2S2F1            | 1220.4821 (4+) | 10115±1223  | 8.3           | 16344±1185 | 14.3         | *20354±1585  | 14.4       |
|                             | N187                  | A2G2S1              | 1106.7872 (3+) | 8001±990    | 4.0           | 8112±135   | 3.9          | 9075±1064    | 3.7        |
|                             |                       | A2G2S2              | 1203.8190 (3+) | 80533±6953  | 40.7          | 92559±3187 | 44.3         | 101139±7309  | 41.7       |
|                             |                       | A2G2S2F1            | 939.6307 (4+)  | 13005±1674  | 6.6           | 26131±3548 | 12.5         | *28105±3245  | 11.6       |
|                             |                       | A3G3                | 1131.4661 (3+) | 7957±563    | 4.0           | 8503±928   | 4.1          | 10202±456    | 4.2        |
|                             |                       | A3G3S1              | 1228.4979 (3+) | 11316±1164  | 5.7           | 12299±1071 | 5.9          | 11319±1345   | 4.7        |
|                             |                       | A3G3S2              | 994.3992 (4+)  | 17563±2235  | 8.9           | *7834±332  | 3.8          | 11891±1093   | 4.9        |
|                             |                       | A3G3S2F1            | 1030.9137 (4+) | 18037±1530  | 9.1           | 25218±1544 | 12.1         | *30159±3621  | 12.4       |
| A3G3S3                      |                       | 1067.1731 (4+)      | 21269±3309     | 10.8        | *8823±998     | 4.2        | 12707±1617   | 5.2          |            |
| A3G3S3F1                    |                       | 1103.6876 (4+)      | 8790±1616      | 4.4         | 8174±751      | 3.9        | 14899±2212   | 6.1          |            |
| A4G4                        | 1253.1768 (3+)        | 11247±1201          | 5.7            | 11232±1056  | 5.4           | 13119±605  | 5.4          |              |            |
| N453                        | A2G2S1                | 913.1450 (4+)       | 12156±549      | 5.5         | 9513±172      | 2.7        | 9832±973     | 2.8          |            |
|                             | A2G2S1F1              | 949.6595 (4+)       | 10077±894      | 4.6         | 16144±1866    | 4.6        | 20512±2518   | 5.9          |            |
|                             | A2G2S2                | 985.9189 (4+)       | 180111±19486   | 82.0        | 270251±19091  | 77.3       | 260039±27066 | 74.2         |            |
|                             | A2G2S2F1              | 1022.4333 (4+)      | 17368±2316     | 7.9         | *53664±7335   | 15.4       | *60098±6294  | 17.1         |            |
| CFH<br><i>P08603</i>        | N217                  | A2G2S2              | 887.3742 (4+)  | 20173±1864  | 93.5          | 16092±1863 | 83.8         | 21153±1992   | 82.4       |
|                             |                       | A2G2S2F1            | 923.8887 (4+)  | 1406±122    | 6.5           | *3102±182  | 16.2         | *4529±486    | 17.6       |
| N882                        | A2G2                  | 911.6480 (4+)       | 28007±2505     | 6.7         | *16110±1860   | 5.3        | *16998±1631  | 4.4          |            |
|                             | A2G2S1                | 984.4218 (4+)       | 10029±947      | 2.4         | 18205±2320    | 6.0        | 16005±1907   | 4.2          |            |
|                             | A2G2S2                | 1057.1957 (4+)      | 350215±34546   | 83.7        | *220038±16664 | 72.7       | 300138±23621 | 78.5         |            |
|                             | A2G2S2F1              | 1093.7102 (4+)      | 21312±2728     | 5.1         | 36216±3892    | 12.0       | 35835±3905   | 9.4          |            |
|                             | A3G3S2                | 1148.4787 (4+)      | 2506±190       | 0.6         | 3431±294      | 1.1        | *4112±385    | 1.1          |            |
|                             | A3G3S2F1              | 1184.9932 (4+)      | 1009±124       | 0.2         | *3837±514     | 1.3        | *3061±337    | 0.8          |            |
|                             | A3G3S3                | 1221.2526 (4+)      | 5546±432       | 1.3         | 5017±293      | 1.7        | 5998±309     | 1.6          |            |
| N911                        | A2G2S1                | 869.5878 (4+)       | 14141±1915     | 3.1         | 7900±925      | 2.0        | 13006±1725   | 3.0          |            |
|                             | A2G2S1F1              | 906.1023 (4+)       | 15034±1502     | 3.3         | *30171±2637   | 7.6        | *35208±3704  | 8.0          |            |
|                             | A2G2S2                | 942.3617 (4+)       | 420406±43788   | 91.9        | 320524±37147  | 80.3       | 351044±41205 | 80.0         |            |
|                             | A2G2S2F1              | 978.8762 (4+)       | 908±105        | 0.2         | *32353±3951   | 8.1        | *30213±1692  | 6.9          |            |
|                             | A3G3S2                | 1033.6447 (4+)      | 6008±893       | 1.3         | 6025±760      | 1.5        | 8121±1107    | 1.8          |            |
|                             | A3G3S3                | 1106.4186 (4+)      | 1081±25        | 0.2         | *2107±184     | 0.5        | #1415±130    | 0.3          |            |
| N1029                       | A2G2S1                | 835.3315 (4+)       | 18064±1954     | 10.4        | 20144±2774    | 12.1       | 16928±705    | 9.3          |            |
|                             | A2G2S1F1              | 871.8460 (4+)       | 4549±743       | 2.6         | *10108±1380   | 6.1        | *10975±515   | 6.0          |            |
|                             | A2G2S2                | 908.1054 (4+)       | 145238±22655   | 83.3        | 120541±15146  | 72.6       | 141714±18929 | 77.8         |            |
|                             | A2G2S2F1              | 944.6199 (4+)       | 6018±383       | 3.5         | *12010±1366   | 7.2        | 9947±1106    | 5.5          |            |
|                             | A3G3S2                | 999.3884 (4+)       | 503±29         | 0.3         | *3226±201     | 1.9        | *2605±188    | 1.4          |            |

**Table S-3. Relative intensities of identified site-specific glycoforms of tryptic peptides of HPX and CFH.** Glycopeptide signal intensities (SI) in pooled samples of healthy controls (H), cirrhosis (CIR) and HCC patients (2 pools per group, 5 patients per pool) are presented as peak area of precursor ion XIC normalized to the intensity of a stable non-glycosylated tryptic peptide (GGYTLVSGYPK for hemopexin and SSNLIILEEHLK for CFH). Percent value indicates the relative distribution of individual glycoforms at a particular glycosylation site. Results are shown as mean  $\pm$  SD, \* P<0.05 vs H, # P<0.05 HCC vs CIR

**Table S-4**

| Protein<br><i>UNIPROT #</i> | Glycosite<br>position | Glycan<br>structure | m/z(charge)    | H (SI)       | H<br>[%]    | CIR (SI)      | CIR<br>[%] | HCC (SI)       | HCC<br>[%] |
|-----------------------------|-----------------------|---------------------|----------------|--------------|-------------|---------------|------------|----------------|------------|
| Hemopexin<br><i>P02790</i>  | N64                   | A2G2                | 1038.4199 (4+) | 115256±8208  | 91.2        | 1324541±30205 | 84.4       | 145095±13404   | 87.4       |
|                             |                       | A2G2F1              | 1074.9344 (4+) | 7370±812     | 5.8         | *18683±2315   | 11.9       | 14779±1859     | 8.9        |
|                             |                       | A3G3                | 1129.7029 (4+) | 2561±559     | 2.0         | 848±81        | 0.5        | 1044±70        | 0.6        |
|                             |                       | A3G3F1              | 1166.2174 (4+) | 1186±95      | 0.9         | 4951±1737     | 3.2        | 5077±1889      | 3.1        |
|                             | N187                  | A2G2                | 1009.7554 (3+) | 468677±54669 | 79.9        | 365518±19391  | 75.4       | 420926±76770   | 72.4       |
|                             |                       | A2G2F1              | 1058.4413 (3+) | 62393±2179   | 10.6        | 63878±6919    | 13.2       | 88403±16542    | 15.2       |
|                             |                       | A3G3                | 1131.4661 (3+) | 35557±17850  | 6.1         | 21607±3622    | 4.5        | 29680±2072     | 5.1        |
|                             |                       | A3G3F1              | 1180.1521 (3+) | 14796±933    | 2.5         | 22069±1614    | 4.5        | *30220±2899    | 5.2        |
|                             |                       | A3G3F2              | 1228.8380 (3+) | 840±63       | 0.1         | 2406±465      | 0.5        | *3071±335      | 0.5        |
|                             |                       | A4G4                | 940.1346 (4+)  | 3771±1498    | 0.6         | 6923±5556     | 1.4        | 6238±3513      | 1.1        |
|                             |                       | A4G4F1              | 976.6491 (4+)  | 376±134      | 0.1         | 2677±3255     | 0.6        | 2724±2575      | 0.5        |
|                             | N453                  | A2G2                | 1120.1589 (3+) | 913342±80225 | 96.3        | 886004±57384  | 93.7       | 868559±88078   | 92.5       |
| A2G2F1                      |                       | 1168.8449 (3+)      | 16337±3811     | 1.7          | 34644±11919 | 3.7           | 45813±7939 | 4.9            |            |
| A3G3                        |                       | 1241.8697 (3+)      | 16663±7058     | 1.8          | 16466±326   | 1.7           | 15580±1794 | 1.7            |            |
| A3G3F1 <sup>@</sup>         |                       | 1290.5556 (3+)      | 2288±488       | 0.2          | *8233±894   | 0.9           | *8745±1237 | 0.9            |            |
| CFH<br><i>P08603</i>        | N217                  | A2G2                | 741.8265 (4+)  | 16722±560    | 91.6        | 12472±270     | 86.1       | 11888±4332     | 89.4       |
|                             |                       | A2G2F1              | 1074.9344 (4+) | 1532±321     | 8.4         | 2012±241      | 13.9       | 1416±856       | 10.6       |
|                             | N882                  | A2G2                | 911.6480 (4+)  | 213380±87237 | 85.2        | 167264±37896  | 71.1       | 424843±7208    | 70.1       |
|                             |                       | A2G2F1              | 948.1625 (4+)  | 16348±7626   | 6.5         | 38123±6225    | 16.2       | **101879±13057 | 16.8       |
|                             |                       | A3G3                | 1002.9310 (4+) | 14419±117    | 5.8         | 12298±4205    | 5.2        | **31377±1302   | 5.2        |
|                             |                       | A3G3F1              | 1039.4455 (4+) | 6278±1555    | 2.5         | 17541±7113    | 7.5        | **48017±2769   | 7.9        |
|                             | N911                  | A2G2                | 1062.0827 (3+) | 116372±13814 | 83.7        | 102527±3449   | 69.1       | 124283±39793   | 66.1       |
|                             |                       | A2G2F1              | 1110.7687 (3+) | 7297±1760    | 5.2         | 19919±4302    | 13.4       | 24900±8858     | 13.2       |
|                             |                       | A3G3                | 888.0970 (4+)  | 9895±1617    | 7.1         | 11834±2846    | 8.0        | 16746±938      | 8.9        |
|                             |                       | A3G3F1              | 924.6115 (4+)  | 5492±1478    | 3.9         | 14086±490     | 9.5        | *22209±5271    | 11.8       |
|                             | N1029                 | A2G2                | 762.5577 (4+)  | 33755±8178   | 90.9        | 31458±859     | 80.0       | 35627±20698    | 76.3       |
|                             |                       | A2G2F1              | 799.0722 (4+)  | 3376±513     | 9.1         | 7876±1058     | 20.0       | 11074±7923     | 23.7       |

**Table S-4. Relative intensities of site-specific glycoforms in de-sialylated pooled samples from healthy controls (H), cirrhosis (CIR) and HCC patients.** Glycopeptide signal intensities (SI) are presented as peak area of precursor ion XIC normalized to the intensity of internal control non-glycosylated peptide (GGYTLVSGYPK for hemopexin and SSNLIILEEHLK for CFH). Percent value indicates the relative distribution of individual glycoforms at a particular glycosylation site. Results are shown as mean ± SD, \* P<0.05 vs H, # P<0.05 HCC vs CIR, @ Structure out of fragmentation range confirmed by retention time and exact mass

**Table S-5**

| <b>Protein</b><br><i>UNIPROT ID</i> | <b>Peptide</b>         | <b>UNIPROT</b><br><b>position</b> | <b>Glycan</b><br><b>structure</b> | <b>Precursor</b><br><b>m/z (charge)</b> |
|-------------------------------------|------------------------|-----------------------------------|-----------------------------------|-----------------------------------------|
| Hemopexin<br><i>P02790</i>          | CSDGWSFDATTLDDNGTMLFFK | N64                               | A2G2                              | 1038.4 (4+)                             |
|                                     |                        |                                   | A2G2F1                            | 1074.9 (4+)                             |
|                                     |                        |                                   | A3G3                              | 1129.7 (4+)                             |
|                                     |                        |                                   | A3G3F1                            | 1166.2 (4+)                             |
|                                     | SWPAVGNCSSALR          | N187                              | A2G2                              | 1009.7 (3+)                             |
|                                     |                        |                                   | A2G2F1                            | 1058.4 (3+)                             |
|                                     |                        |                                   | A3G3                              | 1131.4 (3+)                             |
|                                     |                        |                                   | A3G3F1                            | 1180.1 (3+)                             |
|                                     |                        |                                   | A3G3F2                            | 1228.8 (3+)                             |
|                                     |                        |                                   | A4G4                              | 940.1 (4+)                              |
|                                     |                        |                                   | A4G4F1                            | 976.7 (4+)                              |
|                                     |                        |                                   | A4G4F2                            | 1013.2 (4+)                             |
|                                     | ALPQPQNVTSLLGCTH       | N453                              | A2G2                              | 1120.1 (3+)                             |
| A2G2F                               |                        |                                   | 1168.8 (3+)                       |                                         |
| CFH<br><i>P08603</i>                | SPDVINGSPISQK          | N217                              | A2G2                              | 741.8 (4+)                              |
|                                     |                        |                                   | A2G2F                             | 778.3 (4+)                              |
|                                     |                        |                                   | A3G3                              | 833.1 (4+)                              |
|                                     |                        |                                   | A3G3F                             | 869.6 (4+)                              |
|                                     | IPCSQPPQIEHGTINSSR     | N882                              | A2G2                              | 911.6 (4+)                              |
|                                     |                        |                                   | A2G2F                             | 948.1 (4+)                              |
|                                     |                        |                                   | A3G3                              | 1002.9 (4+)                             |
|                                     |                        |                                   | A3G3F                             | 1039.4 (4+)                             |
|                                     | ISEENETTCYMGK          | N911                              | A2G2                              | 1062.1 (3+)                             |
|                                     |                        |                                   | A2G2F                             | 1110.7 (3+)                             |
|                                     |                        |                                   | A3G3                              | 888.1 (4+)                              |
|                                     |                        |                                   | A3G3F                             | 924.6 (4+)                              |
|                                     | MDGASNVTCINSR          | N1029                             | A2G2                              | 762.6 (4+)                              |
| A2G2F                               |                        |                                   | 799.1 (4+)                        |                                         |

**Table S-5.** List of precursor ions selected for MRM transitions.



**Table S-6**

| Position<br>Structure | Hemopexin    |               |               |               | Complement factor H |               |               |               |               |               |                |
|-----------------------|--------------|---------------|---------------|---------------|---------------------|---------------|---------------|---------------|---------------|---------------|----------------|
|                       | N64<br>A2G2F | N187<br>A2G2F | N187<br>A3G3F | N453<br>A2G2F | N217<br>A2G2F       | N217<br>A3G3F | N882<br>A2G2F | N882<br>A3G3F | N911<br>A2G2F | N911<br>A3G3F | N1029<br>A2G2F |
| Healthy 1             | 8.5          | 14.1          | 40.9          | 2.5           | 5.9                 | 44.8          | 8.3           | 55.9          | 10.3          | 19.2          | 50.2           |
|                       | 12.4         | 18.0          | 38.8          | 1.9           | 10.1                | 50.0          | 12.4          | 95.8          | 17.5          | 32.4          | 45.2           |
|                       | 14.1         | 10.9          | 30.1          | 1.9           | 4.5                 | 18.4          | 10.9          | 83.7          | 32.5          | 49.2          | 35.7           |
|                       | 11.5         | 14.5          | 38.6          | 1.2           | 9.0                 | 19.5          | 8.9           | 52.9          | 25.5          | 30.2          | 28.6           |
|                       | 7.7          | 14.8          | 66.5          | 2.9           | 10.7                | 34.6          | 8.7           | 70.9          | 10.6          | 37.1          | 36.5           |
| Healthy 2             | 4.9          | 9.5           | 20.1          | 1.0           | 8.2                 | 39.5          | 10.9          | 56.0          | 28.4          | 28.0          | 64.6           |
|                       | 10.6         | 14.9          | 32.7          | 2.4           | 8.2                 | 30.2          | 12.3          | 60.3          | 19.1          | 37.4          | 37.6           |
|                       | 6.8          | 15.7          | 19.6          | 1.6           | 12.3                | 22.9          | 9.5           | 36.6          | 17.4          | 16.4          | 40.2           |
|                       | 8.1          | 12.6          | 18.4          | 1.4           | 9.7                 | 18.1          | 8.6           | 27.3          | 12.0          | 8.6           | 27.8           |
|                       | 7.9          | 14.6          | 34.6          | 2.9           | 16.3                | 27.4          | 9.9           | 52.1          | 12.1          | 23.1          | 30.5           |
| Cirrhosis 1           | 14.3         | 22.9          | 68.3          | 2.8           | 7.4                 | 33.0          | 12.6          | 68.0          | 26.6          | 46.0          | 22.7           |
|                       | 14.6         | 8.4           | 59.5          | 5.0           | 13.1                | 92.9          | 31.9          | 168.4         | 35.8          | 121.3         | 54.2           |
|                       | 16.4         | 28.9          | 101.9         | 4.4           | 23.5                | 34.9          | 27.4          | 152.8         | 18.7          | 92.1          | 53.8           |
|                       | 16.3         | 21.3          | 130.5         | 3.5           | 40.7                | 96.9          | 44.4          | 193.5         | 44.4          | 168.4         | 81.0           |
|                       | 25.0         | 26.5          | 161.3         | 8.3           | 54.9                | 156.6         | 47.7          | 398.8         | 43.8          | 391.1         | 67.4           |
| Cirrhosis 2           | 13.9         | 13.3          | 45.0          | 3.0           | 17.7                | 40.4          | 20.6          | 65.6          | 36.1          | 53.8          | 61.1           |
|                       | 23.1         | 21.1          | 73.3          | 3.3           | 21.2                | 46.4          | 25.8          | 121.5         | 45.2          | 94.2          | 30.9           |
|                       | 18.3         | 23.8          | 51.4          | 5.8           | 13.4                | 34.8          | 29.8          | 67.1          | 41.7          | 46.6          | 24.1           |
|                       | 61.2         | 35.9          | 107.3         | 12.8          | 47.9                | 177.9         | 72.8          | 222.8         | 84.2          | 307.8         | 88.0           |
|                       | 97.4         | 22.1          | 107.8         | 5.6           | 54.9                | 110.9         | 63.5          | 243.9         | 130.9         | 46.1          | 102.1          |
| HCC 1                 | 13.6         | 19.4          | 64.8          | 3.9           | 11.2                | 57.8          | 15.9          | 81.7          | 25.2          | 70.0          | 26.8           |
|                       | 17.9         | 22.9          | 152.4         | 8.3           | 14.8                | 102.6         | 25.7          | 169.1         | 27.3          | 132.4         | 35.8           |
|                       | 11.2         | 28.5          | 78.1          | 3.8           | 17.9                | 54.3          | 23.3          | 87.0          | 30.1          | 67.1          | 44.1           |
|                       | 34.1         | 18.2          | 140.6         | 10.1          | 39.8                | 217.6         | 48.8          | 319.2         | 53.5          | 213.8         | 76.5           |
|                       | 20.9         | 22.8          | 70.0          | 8.1           | 36.4                | 76.8          | 32.1          | 162.2         | 44.9          | 94.6          | 94.3           |
| HCC 2                 | 16.7         | 23.7          | 85.3          | 2.5           | 10.6                | 42.7          | 19.3          | 107.6         | 34.6          | 68.1          | 46.4           |
|                       | 17.8         | 21.5          | 139.5         | 5.7           | 12.9                | 72.1          | 23.4          | 138.2         | 28.8          | 96.0          | 35.2           |
|                       | 20.5         | 17.7          | 68.2          | 4.4           | 12.0                | 28.2          | 18.7          | 105.0         | 25.6          | 49.9          | 46.8           |
|                       | 59.1         | 27.8          | 130.7         | 10.4          | 62.5                | 199.7         | 65.6          | 384.9         | 85.9          | 289.6         | 78.2           |
|                       | 43.5         | 30.2          | 161.1         | 10.9          | 110.7               | 185.5         | 48.5          | 226.6         | 72.4          | 190.7         | 83.4           |

**Table S-6. Fucosylation of desialylated glycopetides in individual samples of healthy controls (H), cirrhosis (CIR) and HCC patients.** Tryptic glycopeptides of hemopexin and CFH from heme-bound fraction of individual patient samples were quantified by LC-MS MRM. Data are expressed as a relative ratio of signal intensities of fucosylated glycopeptide to its non-fucosylated counterpart monitored as the 366 transition (Hex-HexNAc) and shown as percent of the non-fucosylated form for each individual patient sample.

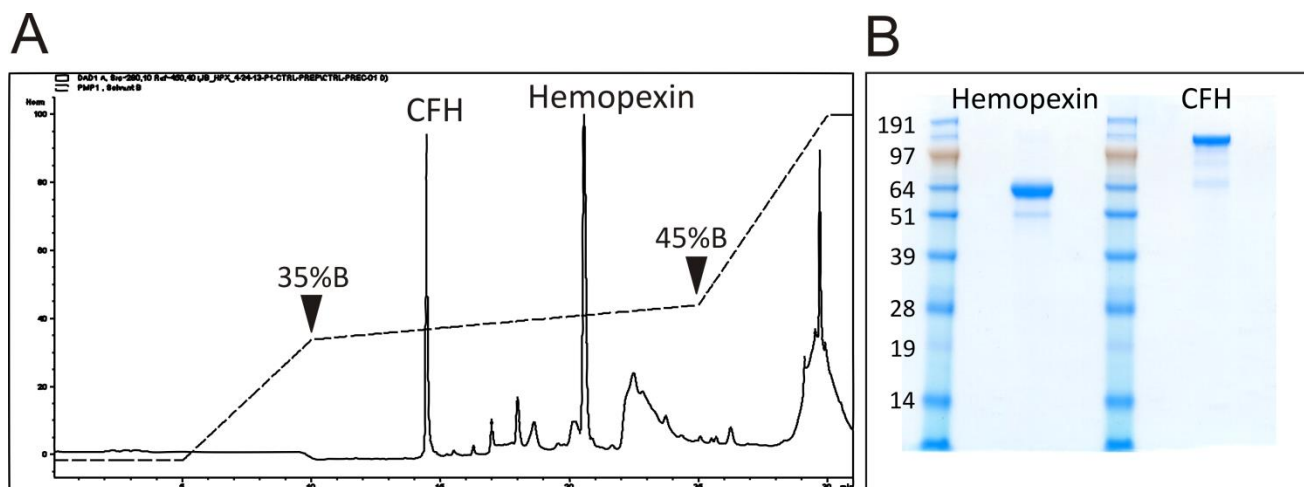

**Figure S-1. Purification of HPX and CFH** **A.** Representative chromatogram of hemin-bound fraction of plasma proteins separated on a C18 column. Two major peaks corresponding to CFH and hemopexin are labeled and the elution gradient is indicated by a dashed line. **B.** Peaks corresponding to CFH and hemopexin separated by SDS-PAGE and stained with Coomassie Blue. The two fractions were free of major contaminants.

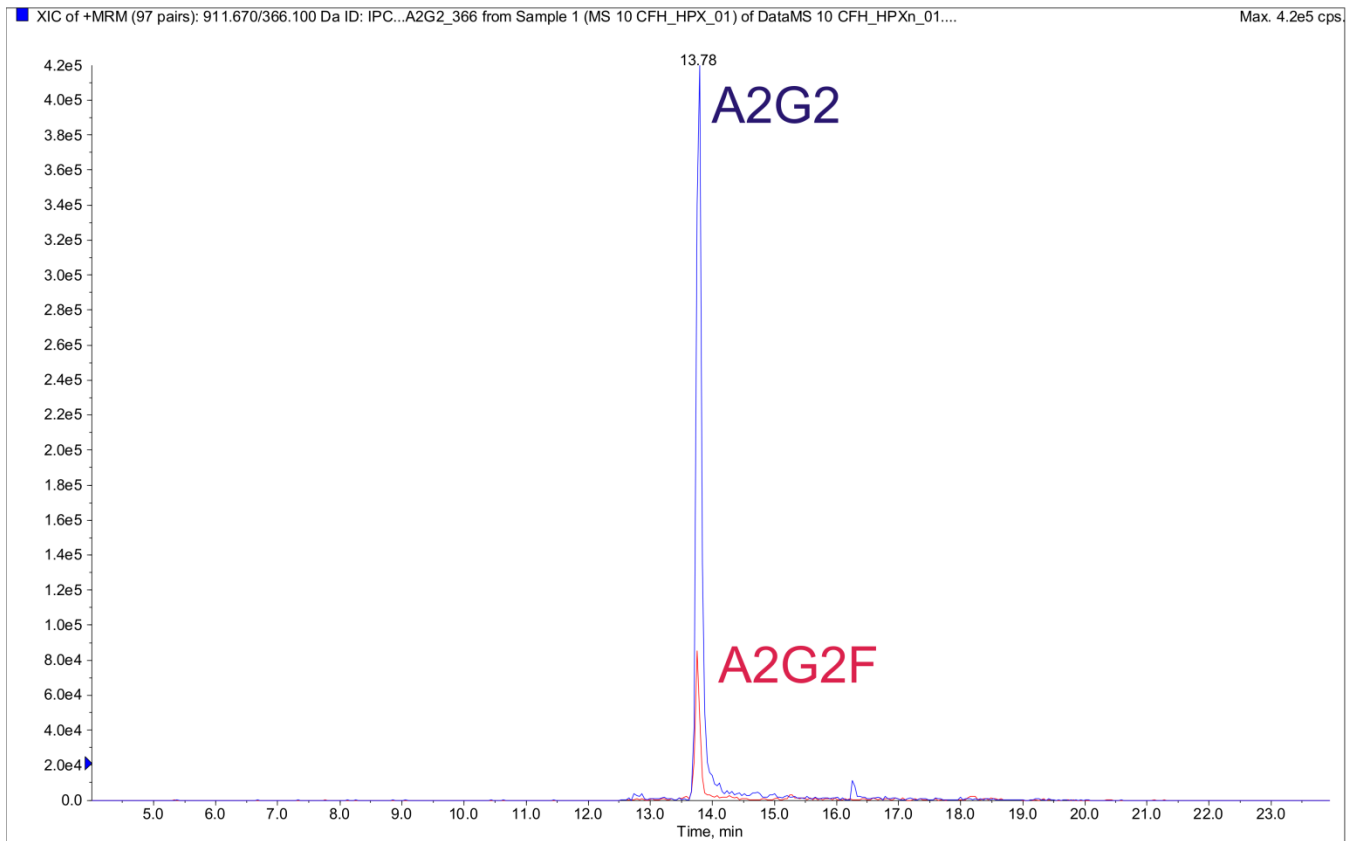

IPCSQPPQIEHG<sup>882</sup>TIN\*SSR

**Figure S-2.** Extracted ion chromatogram (XIC) of fucosylated (red) and non-fucosylated (blue) forms of bi-antennary glycans at N882 of tryptic glycopeptide IPCSQPPQIEHG<sup>882</sup>TIN\*SSR of CFH shows that retention times of both glycoforms are nearly identical.

A.

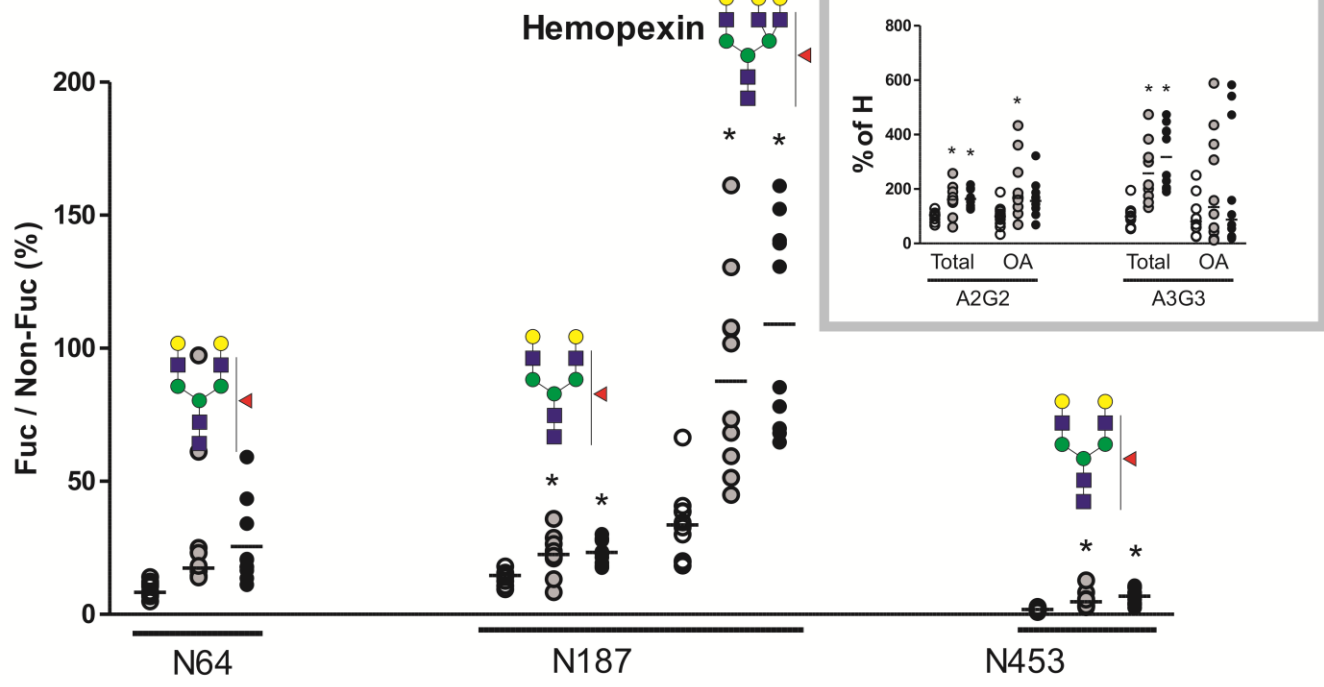

B.

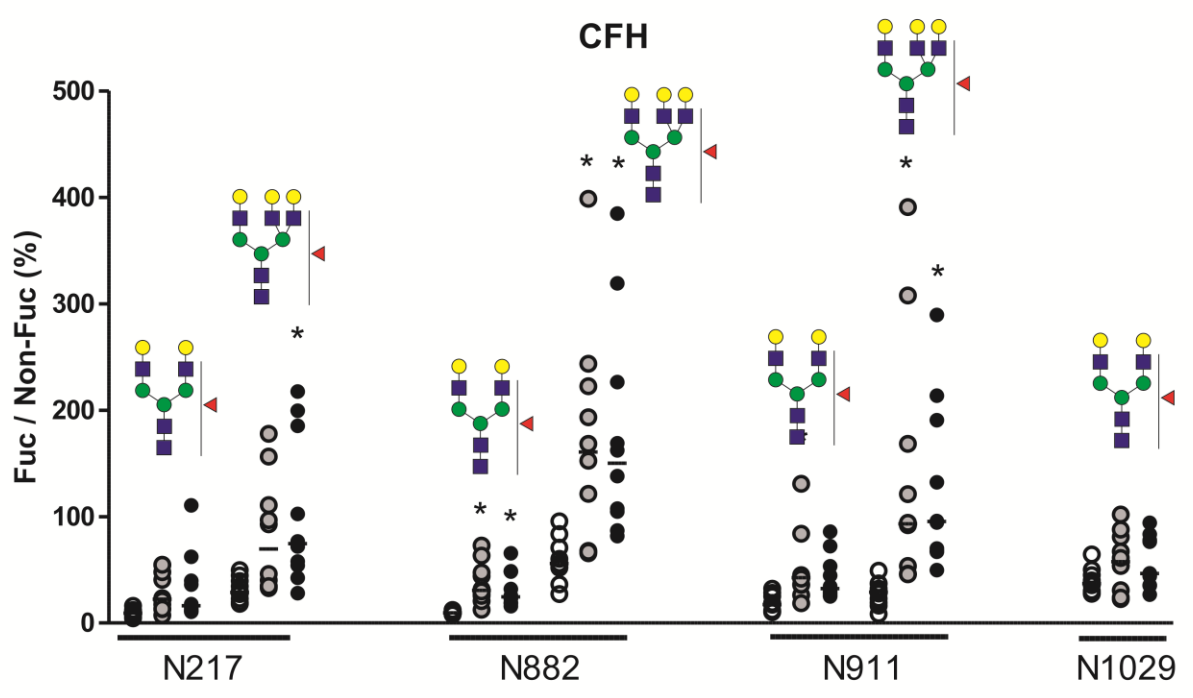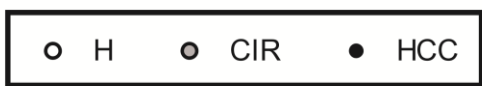

**Figure S-3. Fucosylation of desialylated glycopeptides in individual samples of healthy controls (H), cirrhosis (CIR) and HCC patients.** Tryptic glycopeptides of **A.** Hemopexin, **B.** CFH from heme-bound fraction of individual patient samples were quantified by LC-MS MRM. Data are expressed as a relative ratio of signal intensities of fucosylated glycopeptide to its non-fucosylated counterpart monitored as the 366 transition (Hex-HexNAc) and shown as percent of the non-fucosylated form. Glycan structures representing specific glycoforms are indicated above each group of corresponding bars; position of the glycosylation site in protein sequence is shown below. **Insert.** Comparison of total and outer arm fucosylation at N187 site of hemopexin. Outer arm fucosylation was quantified as 512 transition (Fuc-GlcNAc-Gal) of fucosylated precursor normalized to the 366 transition of its non-fucosylated counterpart; total fucosylation was quantified as above. The relative change in fucosylation in liver disease groups is shown as percent of H. OA; outer arm fucosylation. Distribution of individual values is shown as aligned dot plot, median is indicated by horizontal line., \* P < 0.05 vs H.

A.

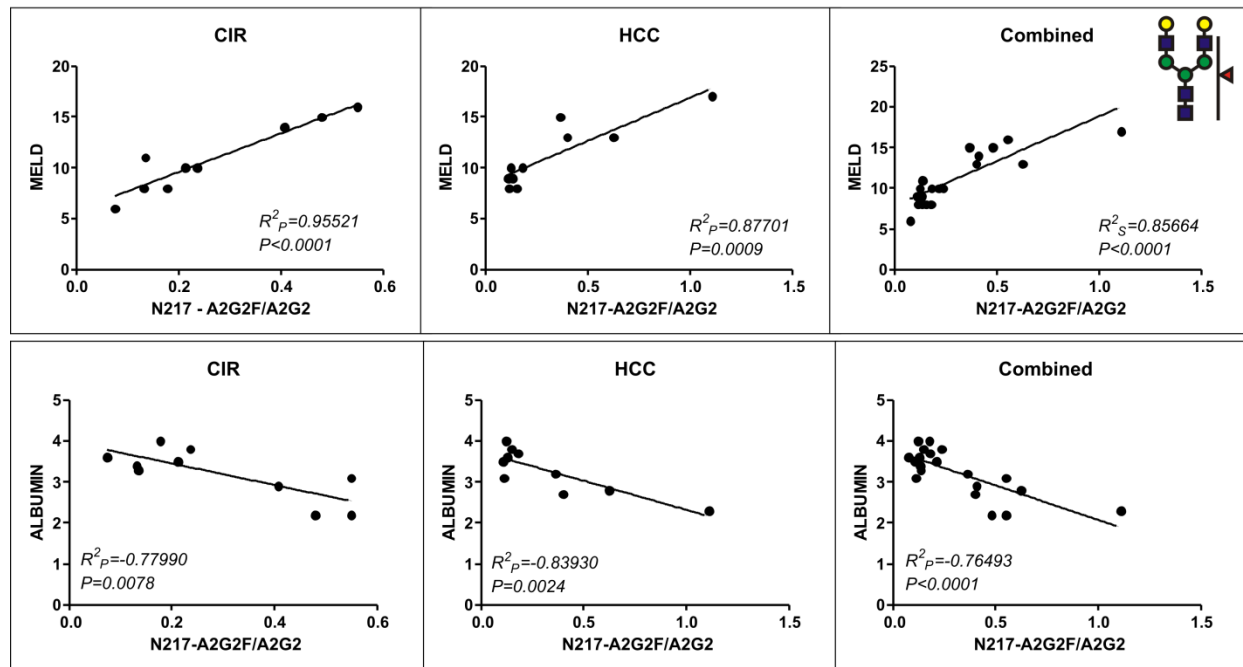

B.

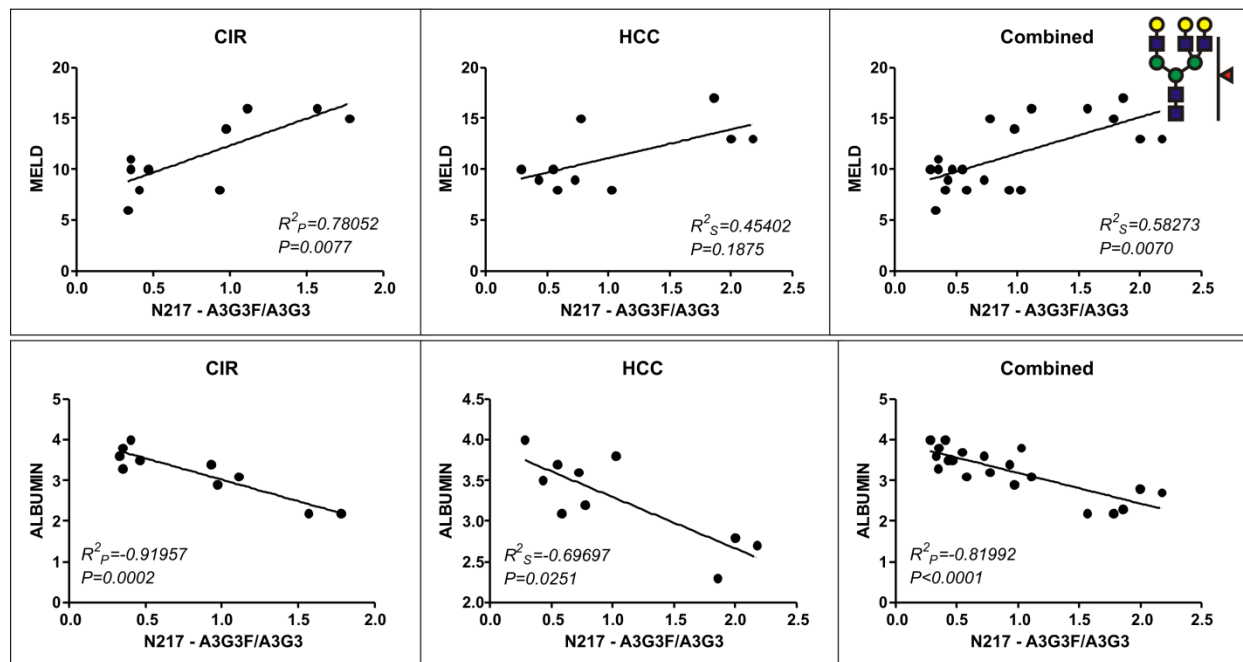

**Figure S-4.** Correlation between the level of fucosylation of bi- (A.) and tri- (B) antennary glycans with MELD score and serum albumin concentration, parameters of liver damage, at N217 site of CFH. The level of fucosylation is expressed as ratio of fucosylated to non-fucosylated forms quantified on individual samples by MRM protocol as described in Methods. Correlation was assessed by Pearson (P) or Spearman (S) correlation analysis depending on the sample distribution.  $R^2$  and  $P$  values are indicated in the figure.
